# Supplementary material for: Changes in STI and HIV testing and testing need among men who have sex with men during the UK’s COVID-19 pandemic response
Source: PubMed Central journal article supplement (PMC10313956; doi:10.1136/sextrans-2022-055429), 2022-07-21
Supplement: sextrans-2022-055429supp001.pdf [file sextrans-2022-055429supp001.pdf]

## Appendix 1 Timeline of RiISH-COVID surveys in relation to COVID-19 social restrictions during the first year of the UK's pandemic response

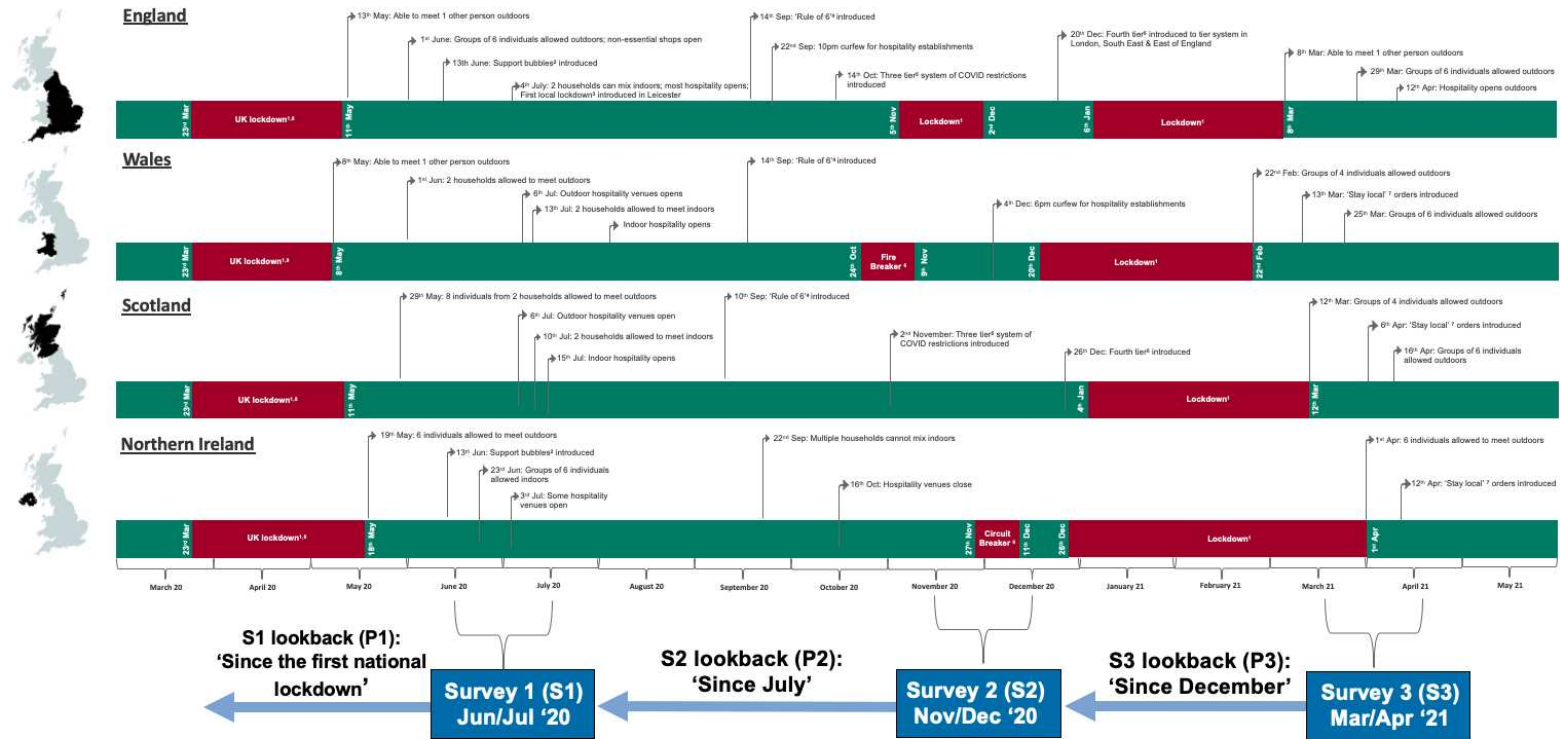

1 'Stay at home' orders implemented across the country, these include: Only leaving home for food, medical reasons, exercise or work; Working from home unless you are unable to do so; Essential shops can remain open.

2 'Support bubbles': Individuals living alone, households with one adult, households with children under the age of one, households with children who have a disability, aged 16 or 17 living without an adult, can join no more than one other household to form a 'bubble' under which they are essentially classed as one household.

3 'Local lockdown': stay at home orders continue to be in force in some local authorities across the UK. Individuals are discouraged from travelling from/to these areas.

4 'Rule of 6': Apart from in work and school environments, any social gatherings of more than 6 individuals is against the law

5 'Tier system': Differing levels of social restrictions, categorised into tiers 1-4 are introduced and can be implemented at local authority levels. Descriptions of tiers can be found here: <https://www.gov.uk/government/publications/tier-posters-medium-high-and-very-high>

6 'Fire/circuit breaker': a short period of stay at home (lockdown) orders to limit rising infections

7 'Stay local': Restrictions on non-essential travel across local authority boundaries remains in place, individuals encouraged to stay within their local council boundaries for non-essential shopping etc.

8 'Social distancing': Across the UK, individuals were encouraged to keep a 2 meter distance from other people. This was later adapted to 1 meter plus, which included keeping a 1 meter distance from other people in addition to taking another precaution, these included: wearing a face covering; separated by plastic screens; being outdoors.

**Appendix 3** Sociodemographic and health-related characteristics reported by participants in the RiISH-COVID surveys conducted during three periods of the first year of the UK's pandemic response

| Survey                                   | RiISH-COVID survey 1 (S1) | RiISH-COVID survey 2 (S2) | RiISH-COVID survey 3 (S3) | p-value (overall difference across surveys) |
|------------------------------------------|---------------------------|---------------------------|---------------------------|---------------------------------------------|
| Participants' characteristics ¶          | Column % (n)              | Column % (n)              | Column % (n)              |                                             |
| <b>Socio-demographics</b>                |                           |                           |                           |                                             |
| <b>Age (years)</b>                       | N=1950                    | N=1463                    | N=1486                    |                                             |
| Under 30                                 | 24.6 (479)                | 26.5 (388)                | 23.8 (353)                | 0.040                                       |
| 30-44                                    | 35.3 (688)                | 37.8 (553)                | 35.5 (528)                |                                             |
| 45 and over                              | 40.2 (783)                | 35.7 (522)                | 40.7 (605)                |                                             |
| <b>Sexual identity</b>                   | N=1950                    | N=1463                    | N=1487                    |                                             |
| Gay                                      | 86.1 (1678)               | 83.4 (1220)               | 84.2 (1252)               | 0.083                                       |
| Bisexual §                               | 14.0 (272)                | 16.6 (243)                | 15.8 (235)                |                                             |
| <b>Ethnicity</b>                         | N=1950                    | N=1463                    | N=1487                    |                                             |
| White                                    | 88.6 (1728)               | 87.8 (1284)               | 90.0 (1338)               | 0.058                                       |
| Black                                    | 1.6 (31)                  | 2.8 (41)                  | 1.8 (27)                  |                                             |
| Asian                                    | 5.2 (101)                 | 4.3 (63)                  | 3.6 (54)                  |                                             |
| Mixed or other                           | 4.6 (90)                  | 5.1 (75)                  | 4.6 (68)                  |                                             |
| <b>Country of residence in the UK</b>    | N=1950                    | N=1463                    | N=1487                    |                                             |
| England                                  | 86.1 (1679)               | 84.3 (1233)               | 83.8 (1246)               | 0.097                                       |
| Scotland                                 | 7.4 (144)                 | 9.8 (144)                 | 9.4 (139)                 |                                             |
| Wales                                    | 4.2 (82)                  | 4.3 (63)                  | 4.9 (73)                  |                                             |
| Northern Ireland                         | 2.3 (45)                  | 1.6 (23)                  | 2.0 (29)                  |                                             |
| <b>Born in the UK</b>                    | N=1950                    | N=1463                    | N=1487                    |                                             |
| Yes                                      | 78.1 (1523)               | 76.9 (1125)               | 78.8 (1171)               | 0.467                                       |
| <b>Highest educational qualification</b> | N=1949                    | N=1463                    | N=1487                    |                                             |
| Degree or higher                         | 59.0 (1149)               | 57.4 (840)                | 55.6 (827)                | 0.146                                       |
| <b>Employed (inc. furlough*)</b>         | N=1939                    | N=1463                    | N=1487                    |                                             |
| Yes                                      | 77.2 (1497)               | 74.9 (1095)               | 77.6 (1154)               | 0.154                                       |
| <b>Living with partner(s)</b>            | N=1950                    | N=1463                    | N=1487                    |                                             |
| Yes                                      | 31.0 (604)                | 29.5 (432)                | 32.8 (488)                | 0.153                                       |

| Health related factors                              |             |            |            |        |
|-----------------------------------------------------|-------------|------------|------------|--------|
| <b>HIV status</b>                                   | N=1950      | N=1463     | N=1487     |        |
| Positive                                            | 10.1 (197)  | 10.6 (155) | 10.6 (157) | 0.868  |
| <b>Currently on anti-retroviral therapy for HIV</b> | N=197       | N=155      | N=157      |        |
| Yes                                                 | 95.9 (189)  | 98.1 (152) | 97.5 (153) | 0.473  |
| <b>Undetectable viral load (last time checked)</b>  | N=197       | N=155      | N=157      |        |
| Yes                                                 | 94.9 (187)  | 97.4 (151) | 96.2 (151) | 0.840  |
| <b>PrEP use (in the lookback period)</b>            | N=1941      | N=1462     | N=1487     |        |
| Yes                                                 | 13.6 (264)  | 23.1 (337) | 20.7 (308) | <0.001 |
| <b>How user took PrEP (in the lookback period)</b>  | N=264       | N=337      | N=308      |        |
| Daily                                               | 35.6 (94)   | 50.7 (171) | 55.8 (172) | <0.001 |
| 4-6 times a week                                    | 8.3 (22)    | 8.9 (30)   | 10.4 (32)  |        |
| Intermittently (e.g. week on/week off)              | 12.9 (34)   | 5.0 (17)   | 3.9 (12)   |        |
| Before and after sex (event based/on demand)        | 28.4 (75)   | 29.1 (98)  | 20.5 (63)  |        |
| One-off(s)                                          | 7.6 (20)    | 4.2 (14)   | 4.9 (15)   |        |
| Other                                               | 7.2 (19)    | 2.1 (7)    | 4.6 (14)   |        |
| <b>Life satisfaction level †</b>                    | N=1948      | N=1463     | N=1484     |        |
| Low                                                 | 31.2 (608)  | 24.4 (357) | 24.7 (367) | <0.001 |
| <b>Anxiety level †</b>                              | N=1943      | N=1460     | N=1484     |        |
| Low/very low                                        | 54.0 (1050) | 41.2 (601) | 44.8 (665) | <0.001 |

¶ Cis-gender MSM

§ including 'Bisexual' (S1: n=220; S2: n=179; S3: n=180); 'Other' (S1: n=44; S2: n=50; S3: n=47); 'Straight' (S1: n=8; S2: n=14; S3: n=8)

† personal well-being (using the Office for National Statistics (ONS) well-being measures); Descriptions/definitions available at:

<https://www.ons.gov.uk/peoplepopulationandcommunity/wellbeing/methodologies/surveysusingthe4officeforationalstatisticspersonalwellbeingquestions>

\* the UK government paid 80% of the salary of those who were unable to work due to COVID-19 restrictions [15]

#### Appendix 4 Sexual behaviour reported by participants in the RiISH-COVID surveys conducted during three periods of the first year of the UK's pandemic response

| Lookback period (period number)                     | March-June/July 2020 (P1) | July-November/December 2020 (P2) | December 2020-March/April 2021 (P3) | p-value (overall difference across periods) |
|-----------------------------------------------------|---------------------------|----------------------------------|-------------------------------------|---------------------------------------------|
|                                                     | Column % (n)              | Column % (n)                     | Column % (n)                        |                                             |
| <b>Sexual behaviours (in the lookback period) ¶</b> |                           |                                  |                                     |                                             |
| <b>Sex with a man</b>                               | N=1950                    | N=1463                           | N=1487                              |                                             |
| None                                                | 22.8 (445)                | 10.5 (153)                       | 14.3 (212)                          | <0.001                                      |
| Virtual only                                        | 14.4 (280)                | 6.1 (89)                         | 8.7 (129)                           |                                             |
| Physical                                            | 62.8 (1225)               | 83.5 (1221)                      | 77.1 (1146)                         |                                             |
| <b>No. of new physical sex* partners</b>            | N=1949                    | N=1460                           | N=1483                              |                                             |
| None                                                | 63.0 (1227)               | 38.3 (559)                       | 48.2 (715)                          | <0.001                                      |
| One                                                 | 13.6 (264)                | 14.4 (210)                       | 14.5 (215)                          |                                             |
| Two or more                                         | 23.5 (458)                | 47.3 (691)                       | 37.3 (553)                          |                                             |
| <b>≥5 new physical sex partners</b>                 | N=1949                    | N=1460                           | N=1483                              |                                             |
| Yes                                                 | 8.1 (158)                 | 21.8 (318)                       | 14.4 (214)                          | <0.001                                      |
| <b>No. of CAS partners</b>                          | N=1950                    | N=1463                           | N=1487                              |                                             |
| None                                                | 62.1 (1211)               | 43.2 (632)                       | 48.5 (721)                          | <0.001                                      |
| One                                                 | 20.4 (398)                | 23.7 (346)                       | 23.9 (356)                          |                                             |
| Two or more                                         | 17.5 (341)                | 33.2 (485)                       | 27.6 (410)                          |                                             |
| <b>Chemsex</b>                                      | N=1950                    | N=1463                           | N=1487                              |                                             |
| Yes                                                 | 3.7 (72)                  | 6.0 (87)                         | 3.8 (56)                            | 0.002                                       |

¶ Cis-gender MSM

\* Physical sex, defined as: any activity intended to achieve orgasm (or close to) for one or both partners

**Appendix 5** Sexual health service use reported by participants in the RiSH-COVID surveys conducted during three periods of the first year of the UK's pandemic response

| Lookback period (period number)                                            | March-June/July 2020 (P1) | July-November/December 2020 (P2) | December 2020-March/April 2021 (P3) | p-value (overall difference across periods) |
|----------------------------------------------------------------------------|---------------------------|----------------------------------|-------------------------------------|---------------------------------------------|
|                                                                            | Column % (n)              | Column % (n)                     | Column % (n)                        |                                             |
| <b>HIV-testing ¶</b>                                                       |                           |                                  |                                     |                                             |
| <b>Ever tested for HIV</b>                                                 | N=1950                    | N=1463                           | N=1487                              |                                             |
| Yes                                                                        | 87.5 (1707)               | 89.7 (1313)                      | 88.5 (1316)                         | 0.390                                       |
| <b>Where tested</b> if tested in the lookback period                       | N=521                     | N=515                            | N=538                               |                                             |
| In-person                                                                  | 26.1 (136)                | 53.8 (277)                       | 44.6 (240)                          | <0.001                                      |
| Self-sample                                                                | 73.7 (384)                | 46.2 (238)                       | 55.4 (538)                          |                                             |
| <b>Tried (and failed) to get a HIV test in the lookback period</b>         | N=989                     | N=643                            | N=621                               |                                             |
| Yes                                                                        | 11.6 (115)                | 11.4 (73)                        | 18.8 (117)                          | <0.001                                      |
| <b>Confident accessing a HIV test</b> if not tested in the lookback period | N=1232                    | N=793                            | N=792                               |                                             |
| Yes                                                                        | 60.4 (744)                | 65.6 (520)                       | 73.7 (584)                          | <0.001                                      |
| <b>STI testing ¶</b>                                                       |                           |                                  |                                     |                                             |
| <b>Ever tested for STIs</b>                                                | N=1950                    | N=1463                           |                                     |                                             |
| Yes                                                                        | 81.7 (1593)               | 83.0 (1214)                      | -                                   | 0.330                                       |
| <b>Results of most recent STI test</b>                                     | N=487                     | N=544                            |                                     |                                             |
| Positive for at least 1                                                    | 17.3 (84)                 | 22.6 (123)                       | -                                   | 0.096                                       |
| <b>Where tested</b> if tested in the lookback                              | N=487                     | N=544                            |                                     |                                             |
| In-person                                                                  | 34.5 (168)                | 60.9 (331)                       | -                                   | <0.001                                      |
| Self-sample                                                                | 65.3 (318)                | 39.0 (212)                       | -                                   |                                             |
| <b>Tried (and failed) to get an STI test in the lookback</b>               | N=1950                    | N=1463                           |                                     |                                             |
| Yes                                                                        | 7.6 (148)                 | 6.2 (90)                         | -                                   | 0.103                                       |
| <b>Confident accessing STI testing</b> if not tested in                    | N=1106                    | N=669                            |                                     |                                             |

|                     |            |            |   |       |
|---------------------|------------|------------|---|-------|
| <i>the lookback</i> |            |            |   |       |
| Yes                 | 60.8 (672) | 66.4 (444) | - | 0.018 |

¶ Cis-gender MSM
